# Supplementary material
Source: PubMed Central journal article supplement (PMC10023259)
Supplement: NIHMS1878121-supplement-Table_S4.pdf [file NIHMS1878121-supplement-Table_S4.pdf]

**TM1- LFPALLEC(+125.05, NEM)FGIVLC(+125.05, NEM)GYIAGR**

| #  | b+<br>theoretical | b+<br>observed   | b++<br>theoretical | b++<br>observed | Seq.                   | y+<br>theoretical | y+<br>observed   | y++<br>theoretical | y++<br>observed  | #  |
|----|-------------------|------------------|--------------------|-----------------|------------------------|-------------------|------------------|--------------------|------------------|----|
| 1  |                   |                  |                    |                 | L                      | 2405.2441         |                  | 1203.1257          | <b>1203.1097</b> | 20 |
| 2  | 261.1603          |                  | 131.0835           |                 | F                      | 2292.1597         |                  | 1146.5835          |                  | 19 |
| 3  | 358.213           |                  | 179.6099           |                 | P                      | 2145.0911         |                  | 1073.0492          |                  | 18 |
| 4  | 429.2502          | <b>429.2474</b>  | 215.1285           |                 | A                      | 2048.0383         |                  | 1024.5228          |                  | 17 |
| 5  | 542.3342          | <b>542.3300</b>  | 271.6707           |                 | L                      | 1977.0013         |                  | 989.0043           |                  | 16 |
| 6  | 655.4183          | <b>655.4114</b>  | 328.2128           |                 | L                      | 1863.9172         |                  | 932.4623           |                  | 15 |
| 7  | 784.4609          | <b>784.4537</b>  | 392.7341           |                 | E                      | 1750.8331         |                  | 875.9202           | <b>875.9063</b>  | 14 |
| 8  | 1012.5201         |                  | 506.7637           |                 | <b>C(+125.05, NEM)</b> | 1621.7906         |                  | 811.399            | <b>811.3845</b>  | 13 |
| 9  | 1159.5885         |                  | 580.2979           |                 | F                      | 1393.7314         |                  | 697.3694           | <b>697.3605</b>  | 12 |
| 10 | 1216.61           | <b>1216.5958</b> | 608.8087           |                 | G                      | 1246.663          |                  | 623.8351           |                  | 11 |
| 11 | 1329.694          | <b>1329.6780</b> | 665.3506           |                 | I                      | 1189.6415         |                  | 595.3244           |                  | 10 |
| 12 | 1428.7625         | <b>1428.7487</b> | 714.8849           |                 | V                      | 1076.5575         | <b>1076.5444</b> | 538.7824           |                  | 9  |
| 13 | 1541.8464         | <b>1541.8281</b> | 771.4269           |                 | L                      | 977.4891          | <b>977.4775</b>  | 489.2482           |                  | 8  |
| 14 | 1769.9056         |                  | 885.4565           |                 | <b>C(+125.05, NEM)</b> | 864.405           | <b>864.3933</b>  | 432.7061           |                  | 7  |
| 15 | 1826.9271         |                  | 913.9672           |                 | G                      | 636.3458          | <b>636.3398</b>  | 318.6765           |                  | 6  |
| 16 | 1989.9905         |                  | 995.4989           |                 | Y                      | 579.3243          | <b>579.3185</b>  | 290.1658           |                  | 5  |
| 17 | 2103.0745         |                  | 1052.0409          |                 | I                      | 416.261           | <b>416.2570</b>  |                    |                  | 4  |
| 18 | 2174.1116         |                  | 1087.5594          |                 | A                      | 303.177           | <b>303.1785</b>  |                    |                  | 3  |
| 19 | 2231.1331         |                  | 1116.0702          |                 | G                      | 232.1399          |                  |                    |                  | 2  |
| 20 |                   |                  |                    |                 | R                      | 175.1184          |                  |                    |                  | 1  |

**TM1- LFPALLE(+396.34,LKM38)C(+125.05, NEM)FGIVLC(+125.05, NEM)GYIAGR**

| #  | b+<br>theoretical | b+<br>observed   | b++<br>theoretical | b++<br>observed  | Seq.                     | y+<br>theoretical | y+<br>observed   | y++<br>theoretical | y++<br>observed  | #  |
|----|-------------------|------------------|--------------------|------------------|--------------------------|-------------------|------------------|--------------------|------------------|----|
| 1  |                   |                  |                    |                  | L                        | 2801.5842         |                  | 1401.2958          |                  | 20 |
| 2  | 261.1603          |                  | 131.0835           |                  | F                        | 2688.4995         |                  | 1344.7534          |                  | 19 |
| 3  | 358.213           |                  | 179.6099           |                  | P                        | 2541.4312         |                  | 1271.2192          | <b>1271.2051</b> | 18 |
| 4  | 429.2502          | <b>429.2474</b>  | 215.1285           |                  | A                        | 2444.3784         |                  | 1222.6929          |                  | 17 |
| 5  | 542.3342          | <b>542.3300</b>  | 271.6707           |                  | L                        | 2373.3413         |                  | 1187.1743          |                  | 16 |
| 6  | 655.4183          | <b>655.4114</b>  | 328.2128           |                  | L                        | 2260.2573         |                  | 1130.6323          | <b>1130.6169</b> | 15 |
| 7  | 1180.8009         | <b>1180.7881</b> | 590.9041           |                  | <b>E(+396.34, LKM38)</b> | 2147.1731         |                  | 1074.0902          | <b>1074.0685</b> | 14 |
| 8  | 1408.8601         |                  | 704.9337           |                  | <b>C(+125.05, NEM)</b>   | 1621.7906         |                  | 811.399            | <b>811.3845</b>  | 13 |
| 9  | 1555.9285         |                  | 778.4679           |                  | F                        | 1393.7314         |                  | 697.3694           | <b>697.3605</b>  | 12 |
| 10 | 1612.95           | <b>1612.9650</b> | 806.9786           |                  | G                        | 1246.663          |                  | 623.8351           |                  | 11 |
| 11 | 1726.0339         | <b>1725.9998</b> | 863.5206           |                  | I                        | 1189.6415         |                  | 595.3244           |                  | 10 |
| 12 | 1825.1024         | <b>1825.0898</b> | 913.0549           | <b>913.0408</b>  | V                        | 1076.5575         | <b>1076.5444</b> | 538.7824           |                  | 9  |
| 13 | 1938.1865         | <b>1938.1875</b> | 969.5969           | <b>969.5901</b>  | L                        | 977.4891          | <b>977.4775</b>  | 489.2482           |                  | 8  |
| 14 | 2166.2456         |                  | 1083.6265          |                  | <b>C(+125.05, NEM)</b>   | 864.405           | <b>864.3933</b>  | 432.7061           |                  | 7  |
| 15 | 2223.2671         |                  | 1112.1372          | <b>1112.1273</b> | G                        | 636.3458          | <b>636.3398</b>  | 318.6765           |                  | 6  |
| 16 | 2386.3303         |                  | 1193.6688          | <b>1193.6586</b> | Y                        | 579.3243          | <b>579.3185</b>  | 290.1658           |                  | 5  |
| 17 | 2499.4146         |                  | 1250.2109          | <b>1250.2052</b> | I                        | 416.261           | <b>416.2570</b>  |                    |                  | 4  |
| 18 | 2570.4517         |                  | 1285.7295          | <b>1285.7202</b> | A                        | 303.177           | <b>303.1785</b>  |                    |                  | 3  |
| 19 | 2627.4731         |                  | 1314.2402          | <b>1314.2189</b> | G                        | 232.1399          |                  |                    |                  | 2  |
| 20 |                   |                  |                    |                  | R                        | 175.1184          |                  |                    |                  | 1  |
