# Supplementary material
Source: PubMed Central journal article supplement (PMC10023259)
Supplement: NIHMS1878121-supplement-Table_S5.pdf [file NIHMS1878121-supplement-Table_S5.pdf]

DEP- LVQGGVIQHITNEYEFRDEYLFYR

| #  | b+<br>theoretical | b+<br>observed  | b++<br>theoretical | b++<br>observed | Seq. | y+<br>theoretical | y+<br>observed   | y++<br>theoretical | y++<br>observed  | #  |
|----|-------------------|-----------------|--------------------|-----------------|------|-------------------|------------------|--------------------|------------------|----|
| 1  |                   |                 |                    |                 | L    | 2989.4841         |                  | 1495.2457          |                  | 24 |
| 2  | 213.1603          | <b>213.1567</b> | 107.0835           |                 | V    | 2876.3997         |                  | 1438.7035          |                  | 23 |
| 3  | 341.2189          | <b>341.2133</b> | 171.1128           |                 | Q    | 2777.3313         |                  | 1389.1693          |                  | 22 |
| 4  | 398.2403          |                 | 199.6235           |                 | G    | 2649.2727         |                  | 1325.1400          |                  | 21 |
| 5  | 455.2618          | <b>455.2554</b> | 228.1343           |                 | G    | 2592.2512         |                  | 1296.6293          |                  | 20 |
| 6  | 554.3302          |                 | 277.6687           |                 | V    | 2535.2297         |                  | 1268.1185          |                  | 19 |
| 7  | 667.4142          |                 | 334.2108           |                 | I    | 2436.1614         |                  | 1218.5844          | <b>1218.5699</b> | 18 |
| 8  | 795.4728          |                 | 398.2401           |                 | Q    | 2323.0771         |                  | 1162.0422          | <b>1162.0262</b> | 17 |
| 9  | 932.5317          |                 | 466.7695           |                 | H    | 2195.0186         |                  | 1098.0129          | <b>1097.9976</b> | 16 |
| 10 | 1045.6158         |                 | 523.3116           |                 | I    | 2057.9597         |                  | 1029.4835          | <b>1029.4696</b> | 15 |
| 11 | 1146.6635         |                 | 573.8354           |                 | T    | 1944.8757         |                  | 972.9415           | <b>972.9282</b>  | 14 |
| 12 | 1260.7064         |                 | 630.8569           |                 | N    | 1843.8280         |                  | 922.4177           | <b>922.4059</b>  | 13 |
| 13 | 1389.749          |                 | 695.3782           |                 | E    | 1729.7850         |                  | 865.3962           | <b>865.3854</b>  | 12 |
| 14 | 1552.8124         |                 | 776.9099           |                 | Y    | 1600.7424         |                  | 800.8749           | <b>800.8638</b>  | 11 |
| 15 | 1681.8549         |                 | 841.4311           |                 | E    | 1437.6792         |                  | 719.3433           |                  | 10 |
| 16 | 1828.9233         |                 | 914.9653           |                 | F    | 1308.6366         |                  | 654.8220           | <b>654.8132</b>  | 9  |
| 17 | 1985.0244         |                 | 993.0159           |                 | R    | 1161.5681         | <b>1161.5575</b> | 581.2877           |                  | 8  |
| 18 | 2100.0513         |                 | 1050.5293          |                 | D    | 1005.4670         | <b>1005.4548</b> | 503.2372           |                  | 7  |
| 19 | 2229.094          |                 | 1115.0507          |                 | E    | 890.4401          | <b>890.4286</b>  | 445.7237           |                  | 6  |
| 20 | 2392.1572         |                 | 1196.5823          |                 | Y    | 761.3975          | <b>761.3877</b>  | 381.2024           |                  | 5  |
| 21 | 2505.2415         |                 | 1253.1244          |                 | L    | 598.3342          |                  | 299.6707           |                  | 4  |
| 22 | 2652.3098         |                 | 1326.6586          |                 | F    | 485.2501          | <b>485.2443</b>  |                    |                  | 3  |
| 23 | 2815.373          |                 | 1408.1902          |                 | Y    | 338.1817          |                  |                    |                  | 2  |
| 24 |                   |                 |                    |                 | R    | 175.1184          |                  |                    |                  | 1  |

**DEP- LVQGGVIQHITNEYEF(+396.34,LKM38)RDEYLFYR**

| #  | b+<br>theoretical | b+<br>observed  | b++<br>theoretical | b++<br>observed | Seq.                    | y+<br>theoretical | y+<br>observed   | y++<br>theoretical | y++<br>observed  | #  |
|----|-------------------|-----------------|--------------------|-----------------|-------------------------|-------------------|------------------|--------------------|------------------|----|
| 1  |                   |                 |                    |                 | L                       | 3385.8242         |                  | 1693.4158          |                  | 24 |
| 2  | 213.1603          | <b>213.1567</b> | 107.0835           |                 | V                       | 3272.7395         |                  | 1636.8734          |                  | 23 |
| 3  | 341.2189          | <b>341.2133</b> | 171.1128           |                 | Q                       | 3173.6711         |                  | 1587.3392          |                  | 22 |
| 4  | 398.2403          |                 | 199.6235           |                 | G                       | 3045.6125         |                  | 1523.3099          |                  | 21 |
| 5  | 455.2618          | <b>455.2554</b> | 228.1343           |                 | G                       | 2988.5911         |                  | 1494.7992          |                  | 20 |
| 6  | 554.3302          |                 | 277.6687           |                 | V                       | 2931.5696         |                  | 1466.2885          |                  | 19 |
| 7  | 667.4142          |                 | 334.2108           |                 | I                       | 2832.5012         |                  | 1416.7543          | <b>1416.7375</b> | 18 |
| 8  | 795.4728          |                 | 398.2401           |                 | Q                       | 2719.4172         |                  | 1360.2123          | <b>1360.1942</b> | 17 |
| 9  | 932.5317          |                 | 466.7695           |                 | H                       | 2591.3586         |                  | 1296.183           | <b>1296.1643</b> | 16 |
| 10 | 1045.6158         |                 | 523.3116           |                 | I                       | 2454.2998         |                  | 1227.6536          | <b>1227.6373</b> | 15 |
| 11 | 1146.6635         |                 | 573.8354           |                 | T                       | 2341.2156         |                  | 1171.1115          | <b>1171.0946</b> | 14 |
| 12 | 1260.7064         |                 | 630.8569           |                 | N                       | 2240.168          |                  | 1120.5876          | <b>1120.5732</b> | 13 |
| 13 | 1389.749          |                 | 695.3782           |                 | E                       | 2126.125          |                  | 1063.5662          |                  | 12 |
| 14 | 1552.8124         |                 | 776.9099           |                 | Y                       | 1997.0825         |                  | 999.0449           | <b>999.0314</b>  | 11 |
| 15 | 1681.8549         |                 | 841.4311           |                 | E                       | 1834.0192         |                  | 917.5132           | <b>917.5009</b>  | 10 |
| 16 | 2225.2634         |                 | 1113.1354          |                 | <b>F(+396.34,LKM38)</b> | 1704.9766         |                  | 852.9919           | <b>852.9801</b>  | 9  |
| 17 | 2381.3645         |                 | 1191.1859          |                 | R                       | 1161.5681         | <b>1161.5575</b> | 581.2877           |                  | 8  |
| 18 | 2496.3914         |                 | 1248.6993          |                 | D                       | 1005.467          | <b>1005.4548</b> | 503.2372           |                  | 7  |
| 19 | 2625.4341         |                 | 1313.2207          |                 | E                       | 890.4401          | <b>890.4286</b>  | 445.7237           |                  | 6  |
| 20 | 2788.4973         |                 | 1394.7523          |                 | Y                       | 761.3975          | <b>761.3877</b>  | 381.2024           |                  | 5  |
| 21 | 2901.5813         |                 | 1451.2943          |                 | L                       | 598.3342          |                  | 299.6707           |                  | 4  |
| 22 | 3048.6497         |                 | 1524.8285          |                 | F                       | 485.2501          | <b>485.2443</b>  |                    |                  | 3  |
| 23 | 3211.7131         |                 | 1606.3602          |                 | Y                       | 338.1817          |                  |                    |                  | 2  |
| 24 |                   |                 |                    |                 | R                       | 175.1184          |                  |                    |                  | 1  |
