# Supplementary material
Source: PubMed Central journal article supplement (PMC10023259)
Supplement: NIHMS1878121-supplement-Table_S6.pdf [file NIHMS1878121-supplement-Table_S6.pdf]

**TM1- LFPALLEC(+125.05, NEM)FGIVLCGYIAGR**

| #  | b+<br>theoretical | b+<br>observed   | b++<br>theoretical | b++<br>observed | Seq.                   | y+<br>theoretical | y+<br>observed  | y+++H2O<br>theoretical | y+++H2O<br>observed | y++++H2O<br>theoretical | y++++H2O<br>observed | #  |
|----|-------------------|------------------|--------------------|-----------------|------------------------|-------------------|-----------------|------------------------|---------------------|-------------------------|----------------------|----|
| 1  |                   |                  |                    |                 | L                      | 2280.1941         |                 | 1131.5955              |                     | 754.7327                |                      | 20 |
| 2  | 261.1603          |                  | 131.0835           |                 | F                      | 2167.1096         |                 | 1075.0532              |                     | 717.0378                |                      | 19 |
| 3  | 358.213           |                  | 179.6099           |                 | P                      | 2020.0411         |                 | 1001.5189              |                     | 668.015                 |                      | 18 |
| 4  | 429.2502          |                  | 215.1285           |                 | A                      | 1922.9884         |                 | 952.9926               |                     | 635.6641                |                      | 17 |
| 5  | 542.3342          | <b>542.3385</b>  | 271.6707           |                 | L                      | 1851.9513         |                 | 917.474                |                     | 611.985                 |                      | 16 |
| 6  | 655.4183          | <b>655.4157</b>  | 328.2128           |                 | L                      | 1738.8672         |                 | 860.9319               |                     | 574.2903                |                      | 15 |
| 7  | 784.4609          | <b>784.4598</b>  | 392.7341           |                 | E                      | 1625.7832         |                 | 804.39                 |                     | 536.5957                |                      | 14 |
| 8  | 1012.5201         |                  | 506.7637           |                 | <b>C(+125.05, NEM)</b> | 1496.7406         |                 | 739.8687               |                     |                         |                      | 13 |
| 9  | 1159.5885         | <b>1159.5944</b> | 580.2979           |                 | F                      | 1268.6814         |                 | 625.8391               |                     |                         |                      | 12 |
| 10 | 1216.61           | <b>1216.5897</b> | 608.8087           |                 | G                      | 1121.613          |                 | 552.3049               |                     |                         |                      | 11 |
| 11 | 1329.694          | <b>1329.6908</b> | 665.3506           | <b>665.3516</b> | I                      | 1064.5916         |                 | 523.7942               |                     |                         |                      | 10 |
| 12 | 1428.7625         | <b>1428.7394</b> | 714.8849           | <b>714.8787</b> | V                      | 951.5074          |                 | 467.2521               |                     |                         |                      | 9  |
| 13 | 1541.8464         | <b>1541.8351</b> | 771.4269           | <b>771.4122</b> | L                      | 852.4391          |                 | 417.7179               |                     |                         |                      | 8  |
| 14 | 1644.8556         |                  | 822.9315           |                 | C                      | 739.355           |                 | 361.1758               |                     |                         |                      | 7  |
| 15 | 1701.8771         |                  | 851.4422           |                 | G                      | 636.3458          | <b>636.3431</b> |                        |                     |                         |                      | 6  |
| 16 | 1864.9404         |                  | 932.9739           |                 | Y                      | 579.3243          | <b>579.3212</b> |                        |                     |                         |                      | 5  |
| 17 | 1978.0245         |                  | 989.5159           |                 | I                      | 416.261           | <b>416.2581</b> |                        |                     |                         |                      | 4  |
| 18 | 2049.0615         |                  | 1025.0344          |                 | A                      | 303.177           | <b>303.1766</b> |                        |                     |                         |                      | 3  |
| 19 | 2106.083          |                  | 1053.5452          |                 | G                      | 232.1399          |                 |                        |                     |                         |                      | 2  |
| 20 |                   |                  |                    |                 | R                      | 175.1184          |                 |                        |                     |                         |                      | 1  |

**TM1- LFPALLEC(+125.05, NEM)FGIVLC(+484.26, KK231)GYIAGR**

| #  | b+<br>theoretical | b+<br>observed   | b++<br>theoretical | b++<br>observed  | Seq.                     | y+<br>theoretical | y+<br>observed  | y+++H2O<br>theoretical | y+++H2O<br>observed | y++++H2O<br>theoretical | y++++H2O<br>observed | #  |
|----|-------------------|------------------|--------------------|------------------|--------------------------|-------------------|-----------------|------------------------|---------------------|-------------------------|----------------------|----|
| 1  |                   |                  |                    |                  | L                        | 2764.4541         |                 | 1373.7255              |                     | 916.1526                |                      | 20 |
| 2  | 261.1603          |                  | 131.0835           |                  | F                        | 2651.3696         |                 | 1317.1832              |                     | 878.4578                |                      | 19 |
| 3  | 358.213           |                  | 179.6099           |                  | P                        | 2504.3013         |                 | 1243.649               | <b>1243.6385</b>    | 829.4351                | <b>829.4313</b>      | 18 |
| 4  | 429.2502          |                  | 215.1285           |                  | A                        | 2407.2485         |                 | 1195.1227              |                     | 797.0842                |                      | 17 |
| 5  | 542.3342          | <b>542.3385</b>  | 271.6707           |                  | L                        | 2336.2112         |                 | 1159.604               |                     | 773.4050                |                      | 16 |
| 6  | 655.4183          | <b>655.4157</b>  | 328.2128           |                  | L                        | 2223.1272         |                 | 1103.062               | <b>1103.0496</b>    | 735.7104                |                      | 15 |
| 7  | 784.4609          | <b>784.4598</b>  | 392.7341           |                  | E                        | 2110.0432         |                 | 1046.52                | <b>1046.5150</b>    | 698.0157                |                      | 14 |
| 8  | 1012.5201         |                  | 506.7637           |                  | <b>C(+125.05, NEM)</b>   | 1981.0006         |                 | 981.9987               | <b>981.9920</b>     |                         |                      | 13 |
| 9  | 1159.5885         | <b>1159.5944</b> | 580.2979           |                  | F                        | 1752.9414         |                 | 867.9691               |                     |                         |                      | 12 |
| 10 | 1216.61           | <b>1216.5897</b> | 608.8087           |                  | G                        | 1605.873          |                 | 794.4349               |                     |                         |                      | 11 |
| 11 | 1329.694          | <b>1329.6908</b> | 665.3506           | <b>665.3516</b>  | I                        | 1548.8516         |                 | 765.9242               |                     |                         |                      | 10 |
| 12 | 1428.7625         | <b>1428.7394</b> | 714.8849           | <b>714.8787</b>  | V                        | 1435.7675         |                 | 709.3821               | <b>709.3759</b>     |                         |                      | 9  |
| 13 | 1541.8464         | <b>1541.8351</b> | 771.4269           | <b>771.4122</b>  | L                        | 1336.6991         |                 | 659.848                | <b>659.8510</b>     |                         |                      | 8  |
| 14 | 2129.1157         |                  | 1065.0615          | <b>1065.0591</b> | <b>C(+484.26, KK231)</b> | 1223.615          |                 | 603.3059               | <b>603.3077</b>     |                         |                      | 7  |
| 15 | 2186.1372         |                  | 1093.5723          |                  | G                        | 636.3458          | <b>636.3431</b> |                        |                     |                         |                      | 6  |
| 16 | 2349.2004         |                  | 1175.1039          | <b>1175.0833</b> | Y                        | 579.3243          | <b>579.3212</b> |                        |                     |                         |                      | 5  |
| 17 | 2462.2844         |                  | 1231.6459          | <b>1231.6310</b> | I                        | 416.261           | <b>416.2581</b> |                        |                     |                         |                      | 4  |
| 18 | 2533.3215         |                  | 1267.1644          | <b>1267.1603</b> | A                        | 303.177           | <b>303.1766</b> |                        |                     |                         |                      | 3  |
| 19 | 2590.343          |                  | 1295.6752          | <b>1295.6669</b> | G                        | 232.1399          |                 |                        |                     |                         |                      | 2  |
| 20 |                   |                  |                    |                  | R                        | 175.1184          |                 |                        |                     |                         |                      | 1  |
